# Supplementary material
Source: publisher site journal article supplement (https://www.dovepress.com/article/487472)
Supplement: Supplementary file 1 [file get_supplementary_file.php]

**Table S1. Comparation indicators of different timepoints for the OR-PD subgroup.**

|  | baseline | *p*1 value |  | at first evaluation | *p*2 value |  | PD after ORR |
| --- | --- | --- | --- | --- | --- | --- | --- |
| CD3+ (%) | 71.42(63.37,79.46) | 0.600 |  | 74.18(64.78,83.58) | 0.464 |  | 73.14(62.07,84.21) |
| CD3+CD4+ (%) | 39.67(33.81,45.54) | 0.190 |  | 41.50(33.35,49.66) | 0.043 |  | 36.79(31.26,42.31) |
| CD3+CD8+ (%) | 27.53(18.23,36.83) | 0.188 |  | 28.49(18.74,38.24) | 0.146 |  | 31.06(19.10,43.01) |
| CD4+/CD8+ | 1.82(0.99,2.66) | 0.103 |  | 1.88(0.91,2.85) | 0.127 |  | 1.50(0.87,2.12) |
| CD3-CD(16+56)+ (%) | 16.97(10.45,23.48) | 0.712 |  | 15.77(7.25,24.30) | 0.982 |  | 15.81(8.32,23.29) |
| CD3-CD19+ (%) | 10.90(5.97,15.82) | 0.795 |  | 9.28(5.53,13.04) | 0.567 |  | 10.44(4.64,16.24) |
| Ig λ (mg/dl) | 745.22(573.36,917.08) | 0.650 |  | 734.44(570.02,898.86) | 0.679 |  | 710.22(561.01,859.43) |
| Ig κ (mg/dl) | 1291.22(1007.66,1574.79) | 0.746 |  | 1318.33(1067.28,1569.39) | 0.491 |  | 1246.00(1020.72,1471.28) |
| C4 (g/l) | 0.19(0.13,0.24) | 0.387 |  | 0.19(0.14,0.24) | 0.514 |  | 0.20(0.15,0.24) |
| C3 (g/l) | 0.93(0.78,1.08) | 0.370 |  | 1.00(0.87,1.12) | 0.682 |  | 0.97(0.83,1.11) |
| Ig M (g/l) | 1.22(0.74,1.70) | 0.288 |  | 1.14(0.70,1.57) | 0.854 |  | 1.12(0.57,1.66) |
| Ig A (g/l) | 3.96(2.65,5.26) | 0.366 |  | 4.19(3.13,5.25) | 0.464 |  | 4.42(3.01,5.83) |
| Ig G (g/l) | 14.82(11.77,17.86) | 0.901 |  | 14.91(12.44,17.39) | 0.787 |  | 14.64(12.50,16.79) |
| CFB (mg/dl) | 41.78(33.26,50.29) | 0.793 |  | 40.94(31.63,50.26) | 0.938 |  | 41.23(32.52,49.95) |
| NLR | 7.28(1.18,13.38) | 0.136 |  | 3.65(1.96,5.34) | 0.368 |  | 2.81(1.81,3.80) |

**Table S2. Comparation between baseline and first evaluation indicators for the OR-PD group and OR-nPD subgroup.**

|  | OR-PD group | | |  | OR-nPD group | | |
| --- | --- | --- | --- | --- | --- | --- | --- |
|  | baseline | at first evaluation | *p* value |  | baseline | at first evaluation | *p* value |
| CD3+ (%) | 71.42(63.37,79.46) | 74.18(64.78,83.58) | 0.353 |  | 72.63(67.68,77.58) | 76.21(71.94,80.47) | 0.013 |
| CD3+CD4+ (%) | 39.67(33.81,45.54) | 41.50(33.35,49.66) | 0.543 |  | 44.07(39.08,49.06) | 45.35(40.00,50.70) | 0.401 |
| CD3+CD8+ (%) | 27.53(18.23,36.83) | 28.49(18.74,38.24) | 0.672 |  | 24.93(20.44,29.42) | 26.44(22.14,30.75) | 0.143 |
| CD4+/CD8+ | 1.82(0.99,2.66) | 1.88(0.91,2.85) | 0.818 |  | 2.20(1.47,2.93) | 2.07(1.47,2.68) | 0.578 |
| CD3-CD(16+56)+ (%) | 16.97(10.45,23.48) | 15.77(7.25,24.30) | 0.728 |  | 14.76(10.83,18.69) | 16.12(12.03,20.20) | 0.352 |
| CD3-CD19+ (%) | 10.90(5.97,15.82) | 9.28(5.53,13.04) | 0.516 |  | 12.01(8.37,15.65) | 7.12(4.43,9.81) | 0.001 |
| Ig λ (mg/dl) | 745.22(573.36,917.08) | 734.44(570.02,898.86) | 0.905 |  | 630.16(521.00,739.32) | 758.00(658.84,857.16) | 0.004 |
| Ig κ (mg/dl) | 1291.22(1007.66,1574.79) | 1318.33(1067.28,1569.39) | 0.861 |  | 1147.11(949.44,1344.77) | 1337.21(1133.25,1541.17) | 0.021 |
| C4 (g/l) | 0.19(0.13,0.24) | 0.19(0.14,0.24) | 0.859 |  | 0.24(0.18,0.30) | 0.19(0.15,0.23) | 0.040 |
| C3 (g/l) | 0.93(0.78,1.08) | 1.00(0.87,1.12) | 0.286 |  | 0.94(0.80,1.09) | 0.92(0.82,1.03) | 0.623 |
| Ig M (g/l) | 1.22(0.74,1.70) | 1.14(0.70,1.57) | 0.474 |  | 1.29(0.98,1.60) | 1.40(1.05,1.75) | 0.286 |
| Ig A (g/l) | 3.96(2.65,5.26) | 4.19(3.13,5.25) | 0.648 |  | 3.06(2.60,3.52) | 3.72(3.02,4.42) | 0.005 |
| Ig G (g/l) | 14.82(11.77,17.86) | 14.91(12.44,17.39) | 0.952 |  | 13.41(11.23,15.58) | 15.71(13.67,17.76) | 0.003 |
| CFB (mg/dl) | 41.78(33.26,50.29) | 40.94(31.63,50.26) | 0.812 |  | 49.54(42.08,56.99) | 42.66(37.58,47.74) | 0.029 |
| NLR | 7.28(1.18,13.38) | 3.65(1.96,5.34) | 0.140 |  | 5.92(4.16,7.68) | 2.93(2.09,3.76) | 0.001 |

**Table S3. Inter-group and intra-group comparisons for each group according to ICIs.**

|  | baseline | |  | at first evaluation | | *p*3 value |
| --- | --- | --- | --- | --- | --- | --- |
|  |  | *p*1 value |  |  | *p*2 value |
| CD3+ (%) |  | 0.327 |  |  | 0.056 |  |
| atezolizumab | 68.87(62.23,75.50) |  |  | 70.44(61.65,79.23) |  | 0.519 |
| camrelizumab | 72.71(68.53,76.89) |  |  | 69.26(62.89,75.62) |  | 0.078 |
| sintilimab | 74.36(70.57,78.15) |  |  | 77.10(73.21,81.00) |  | 0.039 |
| CD3+CD4+ (%) |  | 0.111 |  |  | 0.034 |  |
| atezolizumab | 42.14(35.54,48.73) |  |  | 41.52(34.55,48.49) |  | 0.740 |
| camrelizumab | 38.20(35.06,41.34) |  |  | 36.88(32.22,41.54) |  | 0.434 |
| sintilimab | 43.52(39.91,47.12) |  |  | 44.77(40.81,48.72) |  | 0.310 |
| CD3+CD8+ (%) |  | 0.050 |  |  | 0.577 |  |
| atezolizumab | 21.95(16.55,27.36) |  |  | 24.09(16.19,31.99) |  | 0.314 |
| camrelizumab | 30.62(26.83,34.41) |  |  | 27.90(24.14,31.65) |  | 0.011 |
| sintilimab | 26.51(22.95,30.08) |  |  | 27.63(23.86,31.41) |  | 0.188 |
| CD4+/CD8+ |  | 0.040 |  |  | 0.111 |  |
| atezolizumab | 2.18(1.42,2.93) |  |  | 2.09(1.18,2.99) |  | 0.633 |
| camrelizumab | 1.33(1.13,1.54) |  |  | 1.41(1.16,1.66) |  | 0.366 |
| sintilimab | 1.95(1.52,2.38) |  |  | 1.95(1.53,2.37) |  | 0.994 |
| CD3-CD(16+56)+ (%) |  | 0.393 |  |  | 0.031 |  |
| atezolizumab | 17.40(12.54,22.27) |  |  | 19.82(12.83,26.81) |  | 0.171 |
| camrelizumab | 18.80(14.69,22.92) |  |  | 22.50(16.08,28.92) |  | 0.068 |
| sintilimab | 15.46(12.19,18.73) |  |  | 14.59(11.68,17.51) |  | 0.555 |
| CD3-CD19+ (%) |  | 0.052 |  |  | 0.923 |  |
| atezolizumab | 12.97(9.18,16.77) |  |  | 8.58(5.63,11.53) |  | 0.052 |
| camrelizumab | 7.84(5.65,10.03) |  |  | 7.59(4.91,10.27) |  | 0.825 |
| sintilimab | 9.61(7.62,11.61) |  |  | 7.80(5.24,10.36) |  | 0.140 |
| Ig λ (mg/dl) |  | 0.657 |  |  | 0.085 |  |
| atezolizumab | 630.22(420.85,839.60) |  |  | 802.33(648.18,956.49) |  | 0.027 |
| camrelizumab | 647.55(548.09,747.01) |  |  | 652.90(584.39,721.41) |  | 0.855 |
| sintilimab | 698.55(606.68,790.41) |  |  | 777.55(687.23,867.87) |  | 0.025 |
| Ig κ (mg/dl) |  | 0.438 |  |  | 0.411 |  |
| atezolizumab | 1075.56(865.37,1285.75) |  |  | 1455.56(1232.61,1678.51) |  | 0.009 |
| camrelizumab | 1257.10(1097.41,1416.79) |  |  | 1267.55(1126.87,1408.23) |  | 0.865 |
| sintilimab | 1205.55(1068.98,1342.12) |  |  | 1332.48(1189.54,1475.43) |  | 0.027 |
| C4 (g/l) |  | 0.848 |  |  | 0.862 |  |
| atezolizumab | 0.24(0.17,0.30) |  |  | 0.20(0.15,0.25) |  | 0.010 |
| camrelizumab | 0.23(0.19,0.28) |  |  | 0.22(0.17,0.27) |  | 0.531 |
| sintilimab | 0.22(0.18,0.26) |  |  | 0.21(0.18,0.24) |  | 0.208 |

**Continued Table S3.**

|  | baseline | |  | at first evaluation | | *p* value |
| --- | --- | --- | --- | --- | --- | --- |
|  |  | *p* value |  |  | *p* value |  |
| C3 (g/l) |  | 0.811 |  |  | 0.927 |  |
| atezolizumab | 0.91(0.72,1.10) |  |  | 0.90(0.78,1.02) |  | 0.794 |
| camrelizumab | 0.95(0.84,1.07) |  |  | 0.89(0.81,0.97) |  | 0.181 |
| sintilimab | 0.91(0.83,0.99) |  |  | 0.91(0.83,0.99) |  | 0.948 |
| Ig M (g/l) |  | 0.980 |  |  | 0.736 |  |
| atezolizumab | 1.20(0.84,1.56) |  |  | 1.20(0.91,1.48) |  | 0.973 |
| camrelizumab | 1.24(0.79,1.69) |  |  | 1.16(0.74,1.59) |  | 0.136 |
| sintilimab | 1.21(1.00,1.41) |  |  | 1.32(1.07,1.57) |  | 0.096 |
| Ig A (g/l) |  | 0.878 |  |  | 0.493 |  |
| atezolizumab | 3.18(2.28,4.07) |  |  | 4.23(2.91,5.56) |  | 0.016 |
| camrelizumab | 3.31(2.85,3.77) |  |  | 3.48(2.99,3.97) |  | 0.333 |
| sintilimab | 3.44(2.80,4.08) |  |  | 3.84(3.15,4.53) |  | 0.015 |
| Ig G (g/l) |  | 0.732 |  |  | 0.537 |  |
| atezolizumab | 13.10(10.19,16.00) |  |  | 16.62(14.29,18.95) |  | 0.007 |
| camrelizumab | 14.41(12.37,16.46) |  |  | 14.94(13.26,16.61) |  | 0.405 |
| sintilimab | 14.16(12.61,15.71) |  |  | 15.67(14.16,17.19) |  | 0.013 |
| CFB (mg/dl) |  | 0.638 |  |  | 0.766 |  |
| atezolizumab | 49.13(38.99,59.28) |  |  | 40.50(32.43,48.57) |  | 0.009 |
| camrelizumab | 44.38(37.84,50.92) |  |  | 39.53(34.58,44.47) |  | 0.126 |
| sintilimab | 45.34(41.12,49.56) |  |  | 41.63(38.07,45.19) |  | 0.040 |
| NLR |  | 0.115 |  |  | 0.794 |  |
| atezolizumab | 7.16(4.53,9.80) |  |  | 2.98(1.84,4.13) |  | 0.002 |
| camrelizumab | 4.17(3.06,5.27) |  |  | 3.74(2.00,5.47) |  | 0.640 |
| sintilimab | 6.44(4.48,8.40) |  |  | 4.09(2.20,5.98) |  | 0.060 |

**Table S4. Tumor response at the first evaluation of each group according to ICIs.**

| first evaluation | atezolizumab group (n=9) | camrelizumab group (n=20) | sintilimab group (n=31) |
| --- | --- | --- | --- |
| CR | 0 | 0 | 1 |
| PR | 6 | 10 | 16 |
| SD | 3 | 5 | 12 |
| PD | 0 | 5 | 2 |
| DCR | 100.0% | 75.0% | 93.5% |
| ORR | 100.0% | 50.0% | 51.6% |

Note: Three patients (two patients received pembrolizumab, and one patient received tislelizumab) were excluded.
